# Supplementary material for: Rapid iodine adsorption from vapor phase and solution by a nitrogen-rich covalent piperazine–triazine-based polymer
Source: Royal Society of Chemistry journal article supplement (doi:10.1039/d1nj00122a), 2021-01-01
Supplement: d1nj00122a1.pdf [file d1nj00122a1.pdf]

# New journal of chemistry

## *Supporting Information*

### **Rapid iodine adsorption from vapor phase and solution by a nitrogen-rich covalent piperazine-triazine-based polymer**

Yalin Huang<sup>a,#</sup>, Wei Li<sup>b,#</sup>, Yuwei Xu<sup>a</sup>, Mu Ding<sup>a</sup>, Jie Ding<sup>a</sup>, Yun Zhang<sup>a</sup>, Yuanhua Wang<sup>a</sup>,

Shanyong Chen<sup>a</sup>, Yongdong Jin<sup>\*,a</sup>, Chuanqin Xia<sup>\*,a</sup>

<sup>a</sup> College of Chemistry, Sichuan University, Chengdu 610064, China.

<sup>b</sup> Department of Cardiothoracic Surgery, Chengdu 610500, China.

# These authors contributed equally to this work.

\*Corresponding authors:

Prof. Y. Jin and Prof. C. Xia

College of Chemistry, Sichuan University

Chengdu, 610064, China

Tel.: +86-28-85412343 (Y. Jin and C. Xia).

E-mail: jinyongdong@scu.edu.cn (Y. Jin), xiachqin@163.com (C. Xia).

## I. General procedures for iodine uptake

### Section. 1 Iodine adsorption in solution

The iodine adsorption experiments in solution were carried out in the following.<sup>1,2</sup> 10 mg of n-CTP and 20 mL cyclohexane solutions of iodine were added to a sealed Erlenmeyer flask to form a mixture solution that was stirred at room temperature. The solid was isolated by centrifugation (8000 rpm, 3 min), and the concentrations of iodine remained in cyclohexane solution were analyzed by UV/vis spectra using the working curve established (Figure S7). The adsorption capacity ( $q_e$ , mg g<sup>-1</sup>) was calculated by the Eq. S1, and the iodine removal efficiency ( $R$ , %) was calculated using the Eq. S2. All tests were carried out at least three times.

$$q_e = \frac{(c_0 - c_e)V}{m} \quad (\text{S1})$$

$$R = \left(1 - \frac{c_e}{c_0}\right) \times 100\% \quad (\text{S2})$$

where  $c_0$ ,  $c_e$  is concentrations of iodine in cyclohexane solution before and after the adsorption of iodine, respectively.

### Section. 2 Kinetic models of the iodine adsorption by n-CTP.

The adsorption data were fitted by the pseudo-first order (Eq. S3) and pseudo-second order (Eq. S4) models to evaluate the controlling mechanism of the iodine adsorption process. The linear forms of the two models can be expressed as follows:

$$\ln(q_e - q_t) = \ln q_e - k_1 t \quad (\text{S3})$$

$$\frac{t}{q_t} = \frac{1}{k_2 q_e^2} + \frac{1}{q_e} t \quad (\text{S4})$$

where  $q_e$  and  $q_t$  ( $\text{g g}^{-1}$ ) are the adsorption capacity of iodine at saturated time and time  $t$  (min), respectively.  $k_1$  ( $\text{min}^{-1}$ ) and  $k_2$  ( $\text{g g}^{-1} \text{min}^{-1}$ ) represents the rate constant of the pseudo-first-order model and pseudo-second-order model respectively.

### Section. 3 Isotherm models of iodine adsorption by n-CTP

To understand the adsorption mechanism, the Langmuir and Freundlich models were used to simulate the adsorption profiles. Langmuir model represents monolayer sorption based on the hypothesis that all the sorption sites have equal affinity and that desorption at one site doesn't influence an adjacent site, which can be described as Eq. S5:

$$\frac{1}{q_e} = \frac{1}{q_m} + \frac{1}{K_L q_m} \frac{1}{C_e} \quad (\text{S5})$$

where  $K_L$  ( $\text{L mg}^{-1}$ ) is the Langmuir constant, which is related to the affinity of binding sites, and  $q_m$  ( $\text{mg g}^{-1}$ ) is the maximum adsorption capacity.

The Freundlich model can be applied for multilayer sorption and the sorption on heterogeneous surfaces, which can be described as Eq. S6:

$$\ln q_e = \ln K_F + \frac{1}{n} \ln C_e \quad (\text{S6})$$

where  $K_F$  and  $n$  are the Freundlich constants related to sorption capacity and sorption intensity, respectively.

## II. Characterization of n-CTP

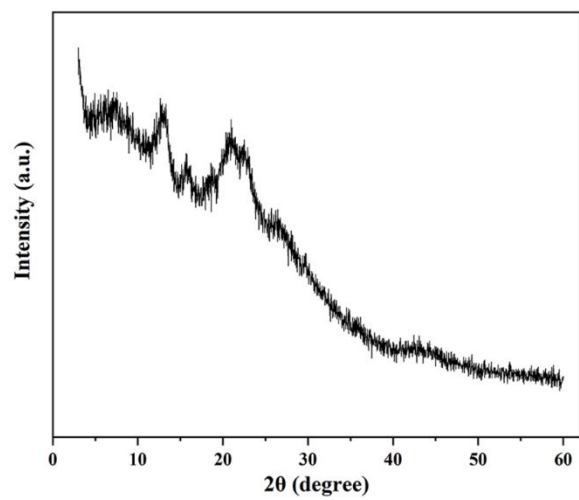

**Fig. S1** PXRD patterns of n-CTP.

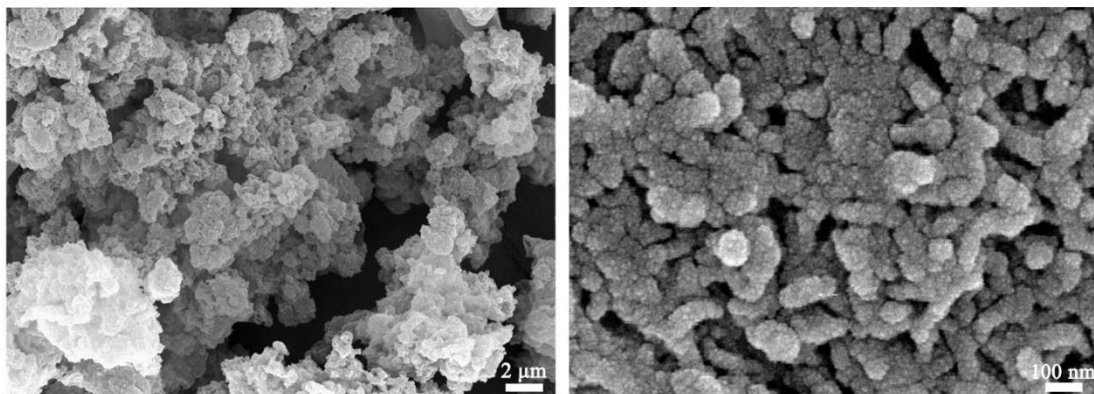

**Fig. S2** SEM images of n-CTP.

### III. Iodine adsorption of n-CTP

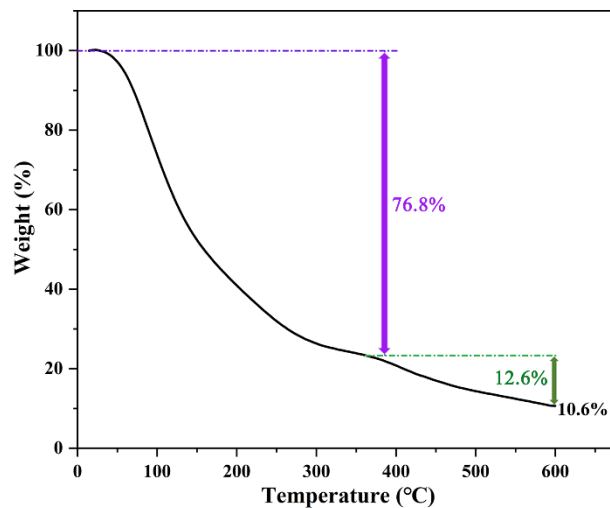

**Fig.S3** TGA curve of the saturated n-CTP@I<sub>2</sub> (in N<sub>2</sub> atmosphere).

**Table. S1** Gravimetric iodine uptake of n-CTP at different time at 25 °C.

| Time (h) | Iodine uptake (g g <sup>-1</sup> ) |
|----------|------------------------------------|
| 1        | 0.2375                             |
| 3        | 0.4250                             |
| 6        | 0.825                              |
| 24       | 1.9125                             |
| 48       | 2.5625                             |
| 72       | 2.7125                             |

**Table. S2** The kinetic parameters for iodine adsorption by n-CTP.

| $q_{e,exp}$<br>( $g\ g^{-1}$ ) | Pseudo-first-order kinetic model |                                |       | Pseudo-second-order kinetic model  |                                |       |
|--------------------------------|----------------------------------|--------------------------------|-------|------------------------------------|--------------------------------|-------|
|                                | $k_1$<br>( $min^{-1}$ )          | $q_{e,cal}$<br>( $g\ g^{-1}$ ) | $R^2$ | $k_2$<br>( $g\ g^{-1}\ min^{-1}$ ) | $q_{e,cal}$<br>( $g\ g^{-1}$ ) | $R^2$ |
| 4.19                           | 0.0128                           | 3.998                          | 0.981 | 0.00541                            | 4.325                          | 0.999 |

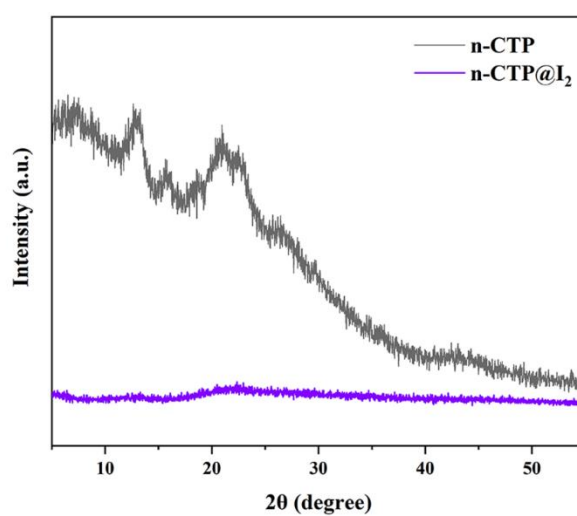

**Fig. S4** PXRD patterns of n-CTP before and after iodine uptake.

**Table. S3** Pore performance of reported adsorbents.

| Porous adsorbent | BET surface area (m <sup>2</sup> g <sup>-1</sup> ) | Pore size (Å) | Pore volume (cm <sup>3</sup> g <sup>-1</sup> ) | Iodine uptake (g g <sup>-1</sup> ) | R <sub>80</sub> (g g <sup>-1</sup> h <sup>-1</sup> ) | Ref.             |
|------------------|----------------------------------------------------|---------------|------------------------------------------------|------------------------------------|------------------------------------------------------|------------------|
| <b>n-CTP</b>     | <b>207.13</b>                                      | <b>34-100</b> | <b>0.586</b>                                   | <b>4.19</b>                        | <b>1.34</b>                                          | <b>This work</b> |
| TPT-BD COF       | 109                                                | 34.3          | 0.30                                           | 5.43                               | 0.75                                                 | 3                |
| LNU-1            | 26                                                 | -             | -                                              | 2.49                               | 0.66                                                 | 4                |
| THPS-C           | 3125                                               | -             | 1.60                                           | 3.40                               | 0.54                                                 | 5                |
| TDTPAP           | 695.2                                              | 12.2          | 0.49                                           | 4.19                               | 0.26                                                 | 6                |
| SIOC-COF-7       | 618                                                | 11.8          | 0.41                                           | 4.81                               | 0.26                                                 | 2                |
| NiP-CMP          | 2630                                               | 7.0-12.5      | 2.288                                          | 2.02                               | 0.25                                                 | 7                |
| AzoPPN           | 400                                                | 5.8-12.7      | 0.68                                           | 2.90                               | 0.23                                                 | 8                |
| TTPDP            | 187.5                                              | 18.8          | 0.10                                           | 3.49                               | 0.21                                                 | 6                |
| TTA-TTB          | 1733                                               | 22            | 1.01                                           | 4.95                               | 0.10                                                 | 9                |
| TPB-DMTP         | 1927                                               | 33            | 1.28                                           | 6.26                               | 0.17                                                 | 9                |
| SCMP-II          | 119.76                                             | 20            | -                                              | 3.45                               | 0.07                                                 | 10               |

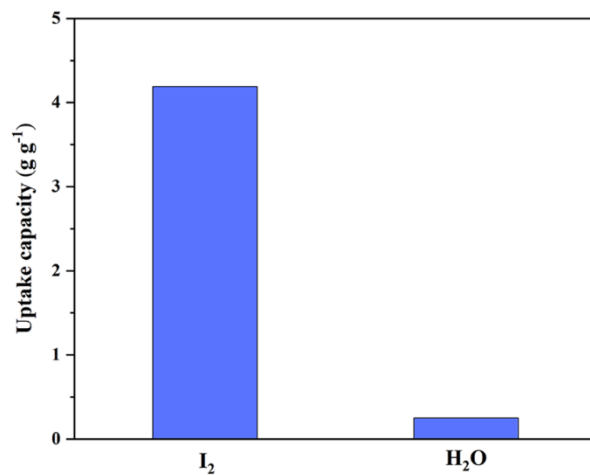

**Fig. S5** The adsorption selectivity of n-CTP for I<sub>2</sub>, water.

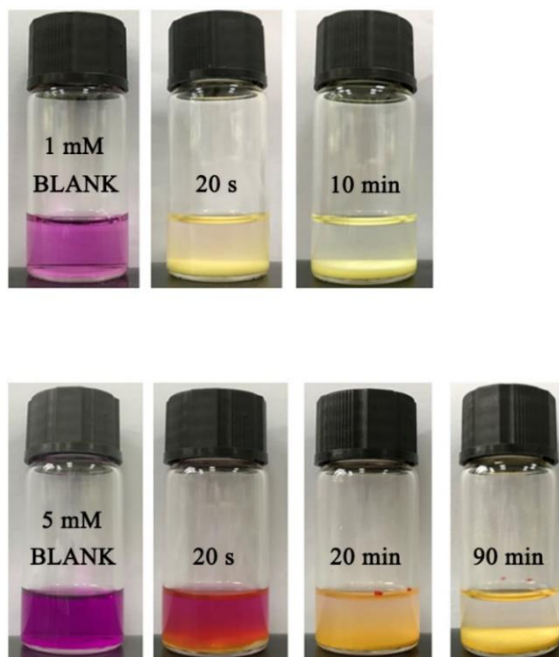

**Figure. S6** Photographs show the color change of I<sub>2</sub> enrichment progress when 20 mg of n-CTP was immersed in a cyclohexane solution of iodine (1 mmol L<sup>-1</sup>, 5 mmol L<sup>-1</sup>, 3 mL).



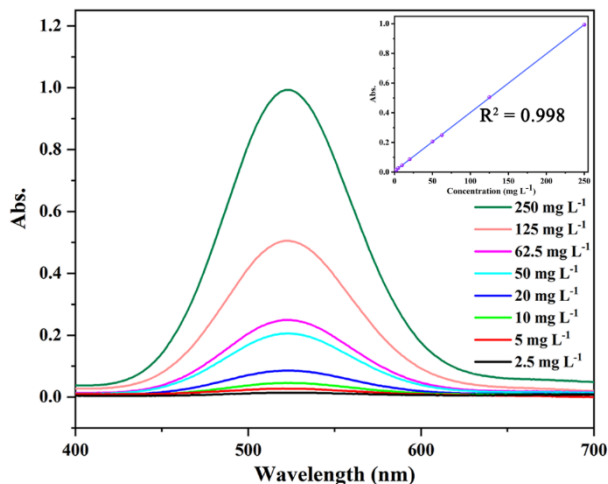

**Figure. S7** Calibration plot of standard iodine by UV/vis spectra in cyclohexane solution. Inset: the fitting of Abs value vs concentration of  $I_2$  with the relatively good linearity satisfies Lambert-Beer Law.

**Table. S4** The kinetic parameters for iodine adsorption on n-CTP in cyclohexane solutions.

| $q_{e, \text{exp}}$<br>( $\text{mg g}^{-1}$ ) | Pseudo-first-order kinetic model |                                               |       | Pseudo-second-order kinetic model               |                                               |       |
|-----------------------------------------------|----------------------------------|-----------------------------------------------|-------|-------------------------------------------------|-----------------------------------------------|-------|
|                                               | $k_1$<br>( $\text{min}^{-1}$ )   | $q_{e, \text{cal}}$<br>( $\text{mg g}^{-1}$ ) | $R^2$ | $k_2$<br>( $\text{g mg}^{-1} \text{min}^{-1}$ ) | $q_{e, \text{cal}}$<br>( $\text{mg g}^{-1}$ ) | $R^2$ |
| 425.5                                         | 0.604                            | 240.6                                         | 0.946 | 0.0076                                          | 434.8                                         | 0.999 |

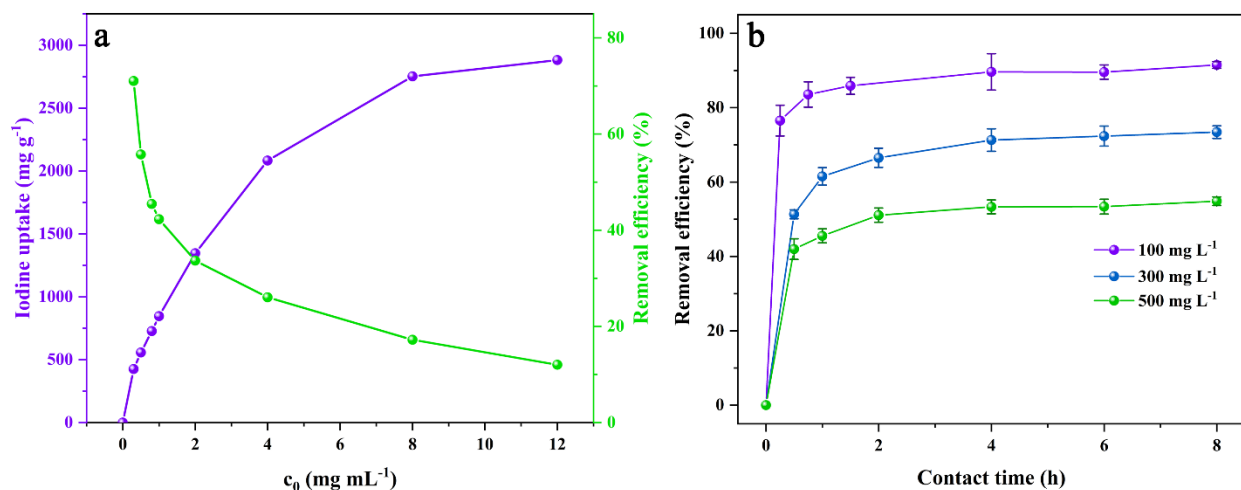

Fig. S8 Effect of initial concentration on the uptake capacity and removal efficiency (a) and effect of contact time on the removal efficiency (b) of iodine onto n-CTP in cyclohexane solutions ( $m/V = 0.5 \text{ g L}^{-1}$ ,  $t = 12 \text{ h}$ ). Error bars represent S.D. (standard deviation),  $n = 3$  independent experiments.

As illustrated in Fig.S8, as the initial iodine solution concentration increases, the removal efficiency of n-CTP decreases and the adsorption capacity increases.

**Table. S5** The parameters for Langmuir and Freundlich isotherm models of iodine adsorption by n-CTP.

| $q_{e,exp}$<br>( $\text{mg g}^{-1}$ ) | Langmuir isotherm model         |                                 |       | Freundlich isotherm model       |       |       |
|---------------------------------------|---------------------------------|---------------------------------|-------|---------------------------------|-------|-------|
|                                       | $K_L$<br>( $\text{L mg}^{-1}$ ) | $q_m$<br>( $\text{mg g}^{-1}$ ) | $R^2$ | $K_F$<br>( $\text{mg g}^{-1}$ ) | $1/n$ | $R^2$ |
| 2880                                  | 0.0035                          | 1667                            | 0.833 | 55.74                           | 0.437 | 0.986 |

## Reference

1. T. Geng, W. Zhang, Z. Zhu and X. Kai, *Microporous Mesoporous Mater.*, 2019, **273**, 163-170.
2. Z. Yin, S. Xu, T. Zhan, Q. Qi, Z. Wu and X. Zhao, *Chem. Commun.*, 2017, **53**, 7266-7269.
3. X. Guo, Y. Tian, M. Zhang, Y. Li, R. Wen, X. Li, X. Li, Y. Xue, L. Ma, C. Xia and S. Li, *Chem. Mater.*, 2018, **30**, 2299-2308.
4. L. Xia, D. Yang, H. Zhang, Q. Zhang, N. Bu, P. Song, Z. Yan and Y. Yuan, *RSC Adv.*, 2019, **9**, 20852-20856.
5. Q. Zhang, T. Zhai, Z. Wang, G. Cheng, H. Ma, Q. Zhang, Y. Zhao, B. Tan and C. Zhang, *Adv. Mater. Interfaces*, 2019, **6**, 1900249.
6. T. Geng, C. Zhang, C. Hu, M. Liu, Y. Fei and H. Xia, *New J. Chem.*, 2020, **44**, 2312-2320.
7. S. A, Y. Zhang, Z. Li, H. Xia, M. Xue, X. Liu and Y. Mu, *Chem. Commun.*, 2014, **50**, 8495-8498.
8. H. Li, X. Ding and B. Han, *Chem. Eur. J.*, 2016, **22**, 11863-11868.
9. P. Wang, Q. Xu, Z. Li, W. Jiang, Q. Jiang and D. Jiang, *Adv. Mater.*, 2018, **30**, 1801991.
10. F. Ren, Z. Zhu, X. Qian, W. Liang, P. Mu, H. Sun, J. Liu and A. Li, *Chem. Commun.*, 2016, **52**, 9797-9800.
